# Supplementary material for: Multiple Weyl fermions and topological phase transition in two-dimensional ferromagnetic CrS2
Source: Royal Society of Chemistry journal article supplement (doi:10.1039/d4cp03606a), 2024-01-01
Supplement: d4cp03606a1.pdf [file d4cp03606a1.pdf]

*Supporting Information for*

Multiple Weyl Fermions and Topological Phase Transition in Two-dimensional Ferromagnetic CrS<sub>2</sub>

Shuo Zhang<sup>a,b</sup>, Wenzhang Cheng<sup>a</sup>, Lei Jin<sup>a\*</sup>, Ying Liu<sup>a</sup>, Xuefang Dai<sup>a</sup>, Guodong Liu<sup>a</sup> and Xiaoming Zhang<sup>a,b\*</sup>

<sup>a</sup>State Key Laboratory of Reliability and Intelligence of Electrical Equipment, and School of Materials Science and Engineering, Hebei University of Technology, Tianjin 300130, China

<sup>b</sup>Hebei Engineering Laboratory of Photoelectronic Functional Crystals, and School of Materials Science and Engineering, Hebei University of Technology, Tianjin 300130, China

E-mail: jinlei994@163.com, zhangxiaoming87@hebut.edu.cn

**I. Band structures of monolayer CrS<sub>2</sub> under different van der Waals corrections**

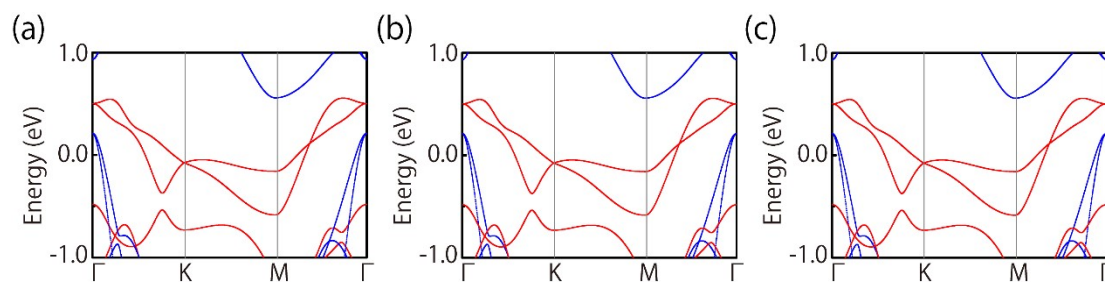

**Figure S1.** (a)-(c) are band structures of monolayer CrS<sub>2</sub> under DFT-D2, DFT-D3 and vdW-DF for van der Waals corrections, respectively. The red and blue lines correspond to the spin-up and spin-down band structures, respectively.

## II. Comparison of the energy among different magnetic states under different $U$ values

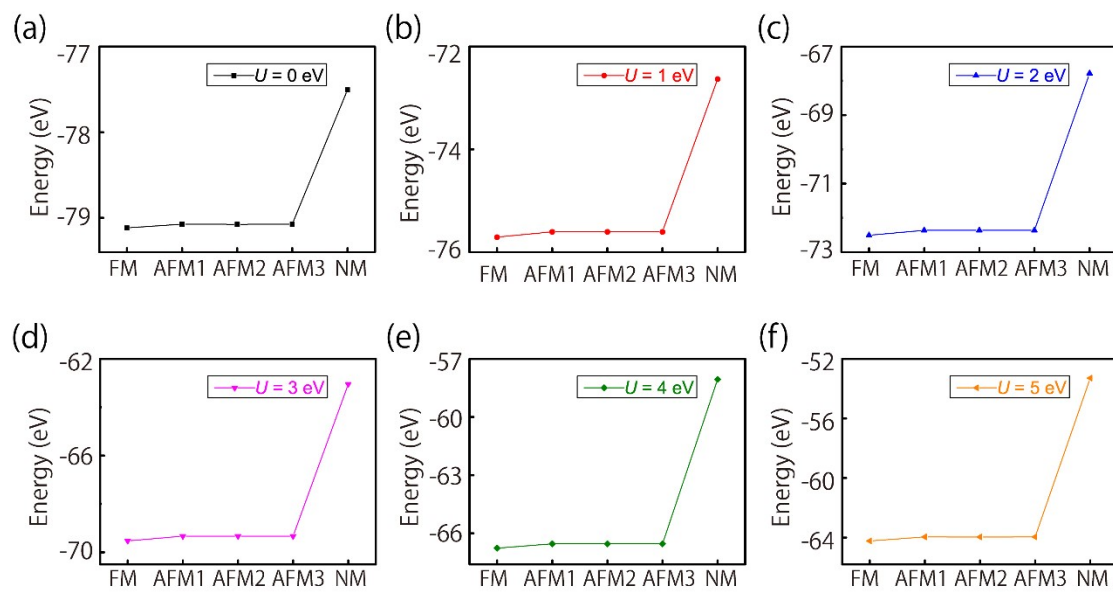

**Figure S2.** (a)-(f) Comparison of the energy among different magnetic states with  $U$  values ranging from 0 to 5 eV.

### III. Band structures of monolayer CrS<sub>2</sub> under different $U$ values

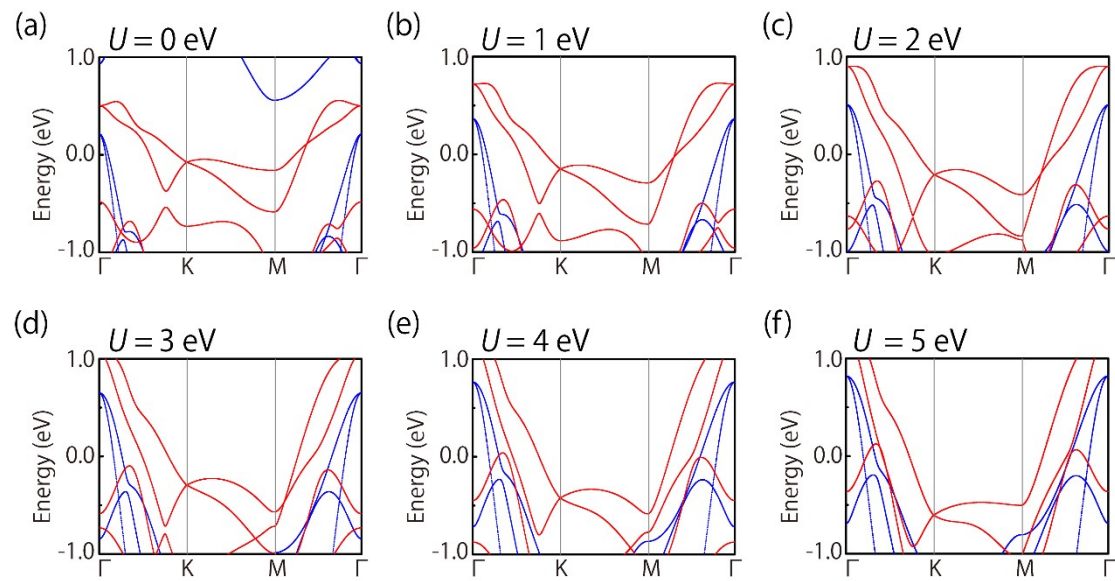

**Figure S3.** The band structures of monolayer CrS<sub>2</sub> when the  $U$  values are chosen as (a) 0, (b) 1, (c) 2, (d) 3, (e) 4, and (f) 5 eV. The red and blue lines correspond to the spin-up and spin-down band structures, respectively.
